# Supplementary material for: Improved representation of river runoff in Estimating the Circulation and Climate of the Ocean Version 4 (ECCOv4) simulations: implementation, evaluation, and impacts to coastal plume regions
Source: Copernicus journal article supplement (doi:10.5194/gmd-14-1801-2021), 2021-04-01
Supplement: Supplementary file 1 [file gmd-14-1801-2021-supplement.pdf]

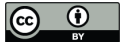

*Supplement of*

**Improved representation of river runoff in Estimating the Circulation and Climate of the Ocean Version 4 (ECCOv4) simulations: implementation, evaluation, and impacts to coastal plume regions**

**Yang Feng et al.**

*Correspondence to:* Yang Feng (yfeng1982@126.com)

The copyright of individual parts of the supplement might differ from the article licence.

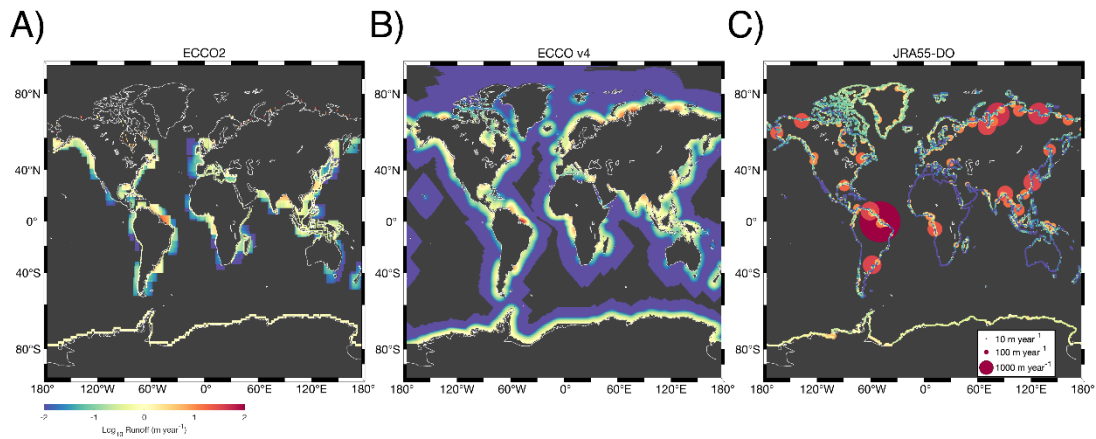

**Figure S1:** River discharge used in experiments: **(a)**  $1^\circ \times 1^\circ$  climatological ECCO2 river forcing for CS510C; **(b)**  $1^\circ \times 1^\circ$  climatological ECCOv4 river forcing for LLC90C and LLC270C; **(c)** the realistic JRA55-DO river forcing for LLC90R, LLC270R, LLC540R and CS510R.

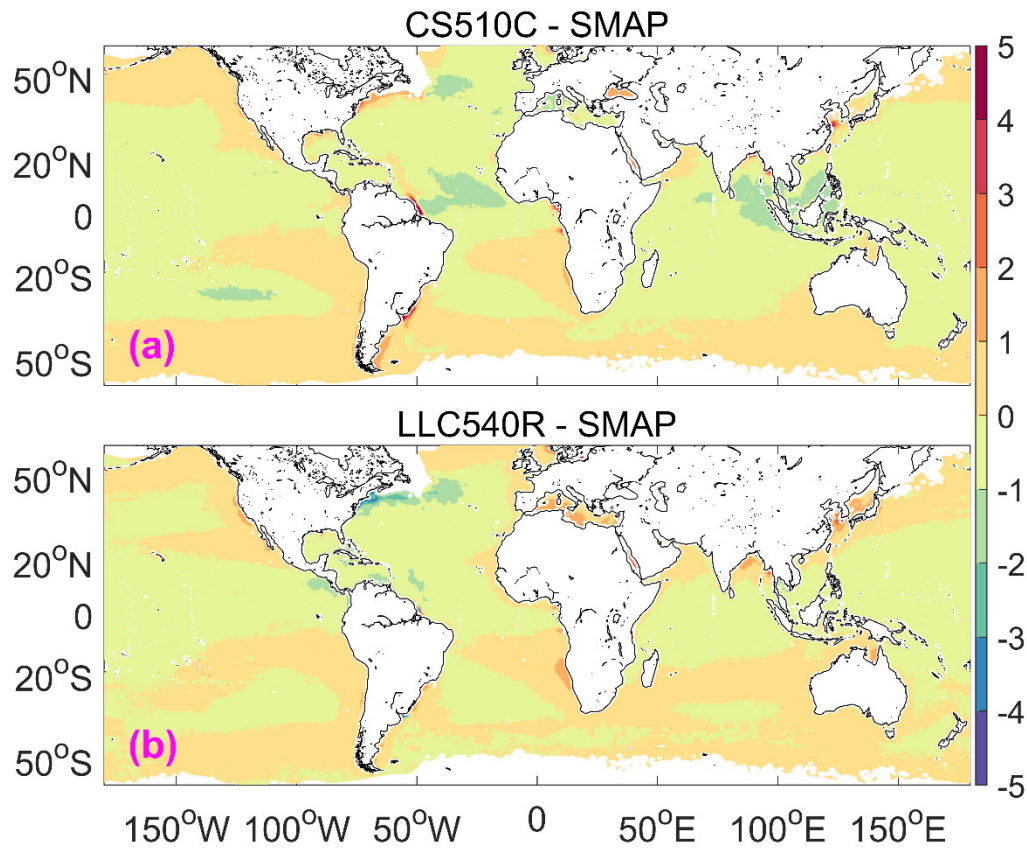

**Figure S2:** The 33-month (Apr 2015–Dec 2017) averaged salinity bias relative to SMAP for the global ocean for the reference run (CS510C) and highest resolution run with daily, point-source runoff forcing (LLC540R). The model SSS is interpolated to the 0.25° SMAP grid for display purposes.

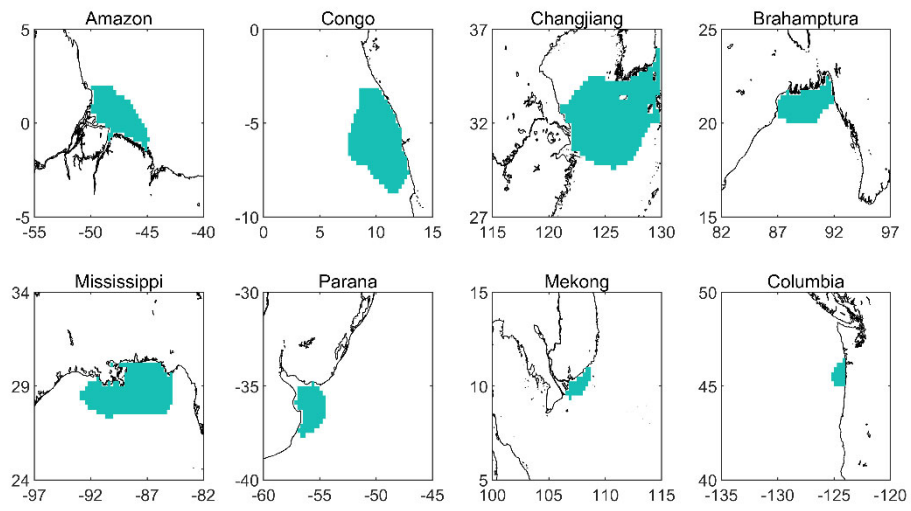

**Figure S3:** The eight river mouth regions that were identified by reconstructing the SSS anomaly field from the 1<sup>st</sup> EOF mode of WOA18.

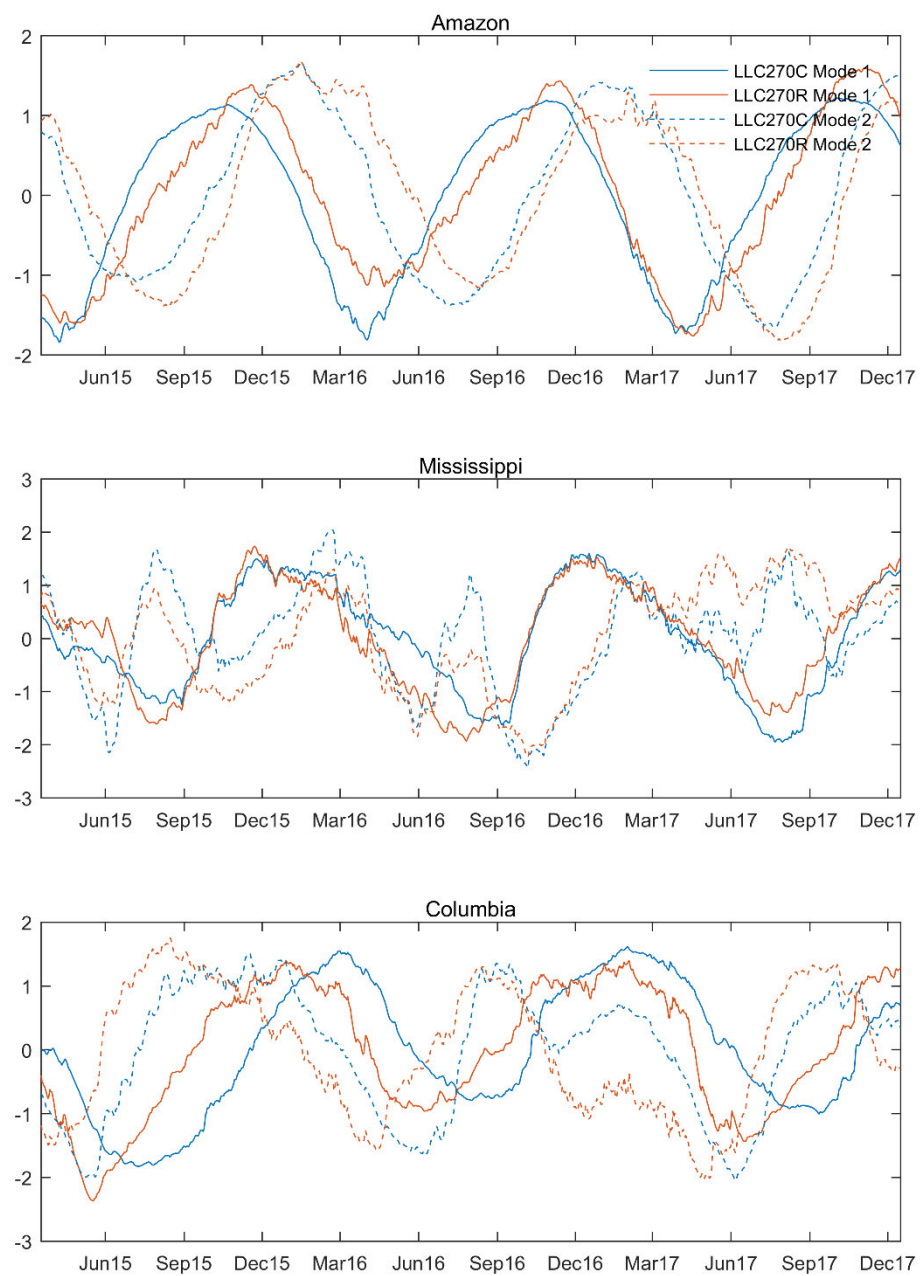

**Figure S4:** PC timeseries of the 1<sup>st</sup> and 2<sup>nd</sup> EOF of LLC270C and LLC270R simulations for the Amazon, Mississippi, and Columbia rivers.

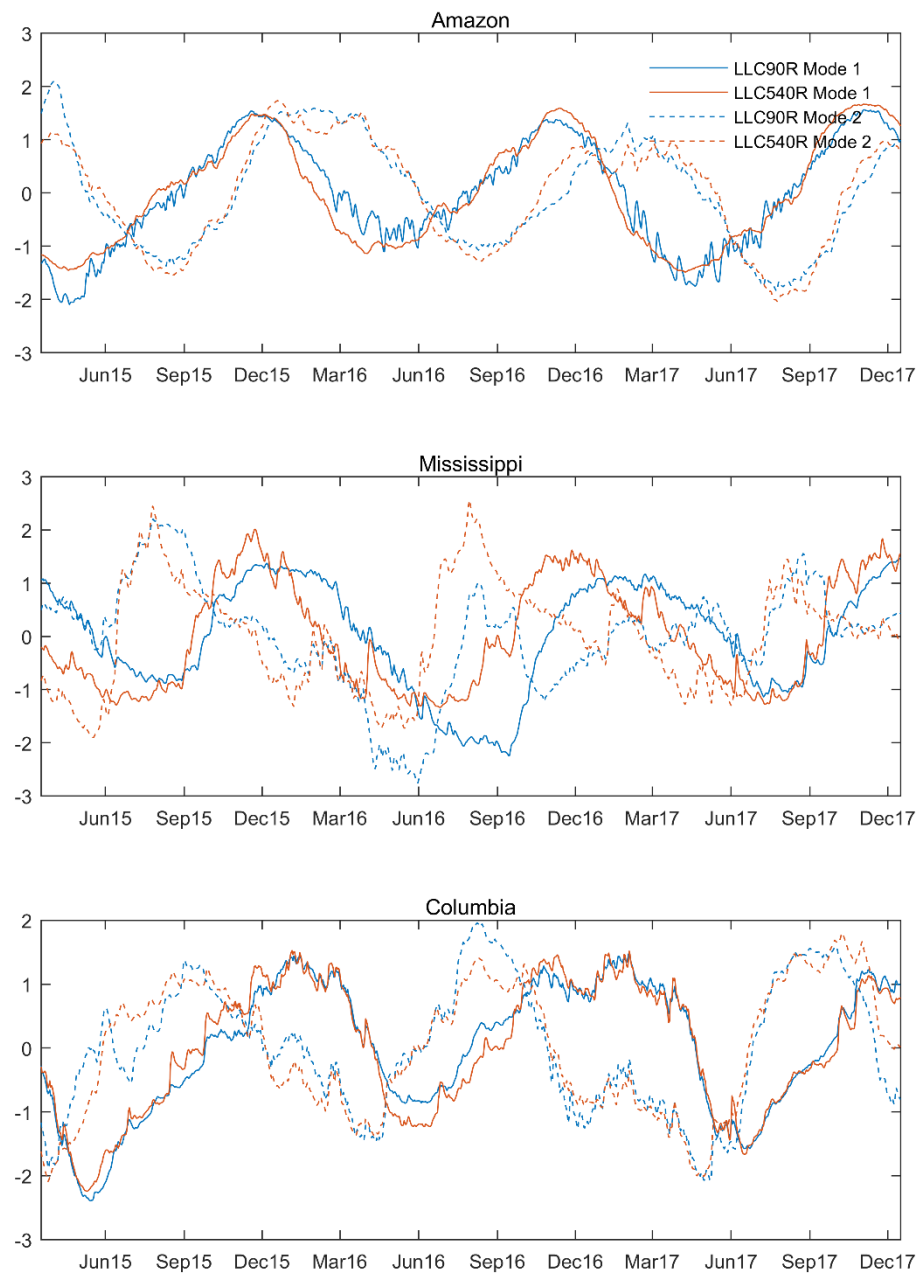

**Figure S5:** PC timeseries of the 1<sup>st</sup> and 2<sup>nd</sup> EOF of LLC90R and LLC540R simulations for the Amazon, Mississippi, and Columbia rivers.

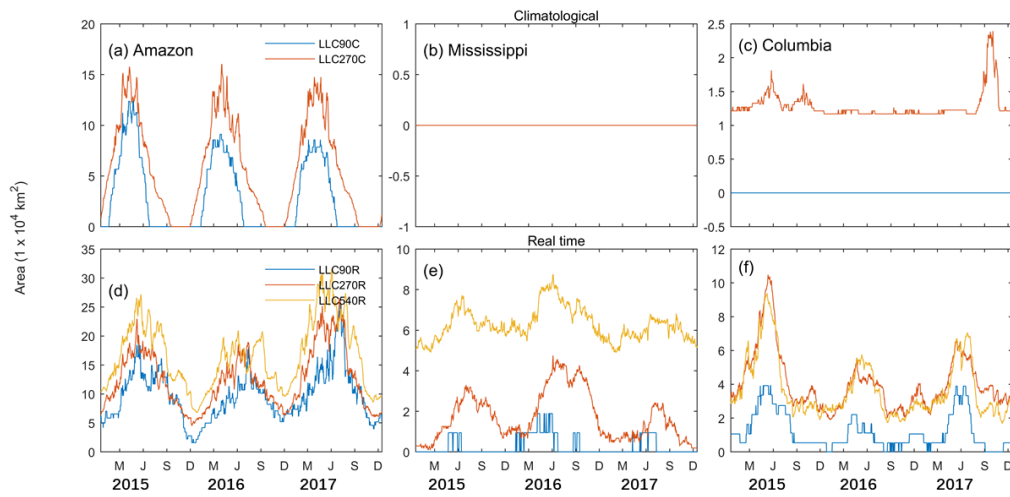

**Figure S6:** Area within 30 PSU in the Amazon, Mississippi, and Columbia river regions for the various experiments.

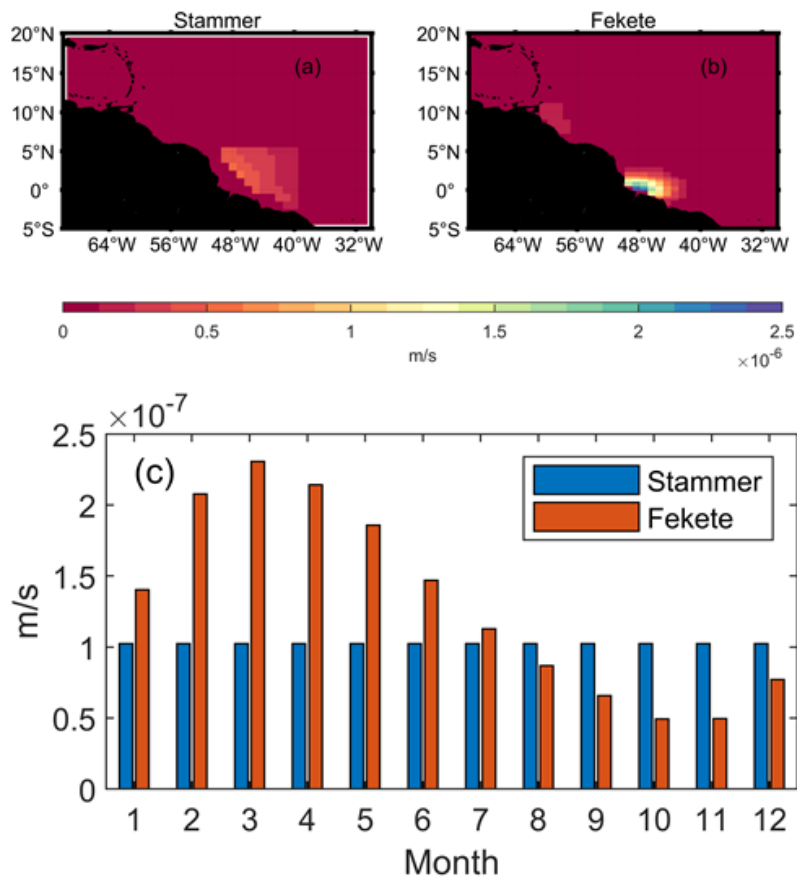

**Figure S7:** Comparison between ECCO2(Cube-sphere grid) Stammer and ECCOv4 (LLC grid) Fekete runoff forcing.



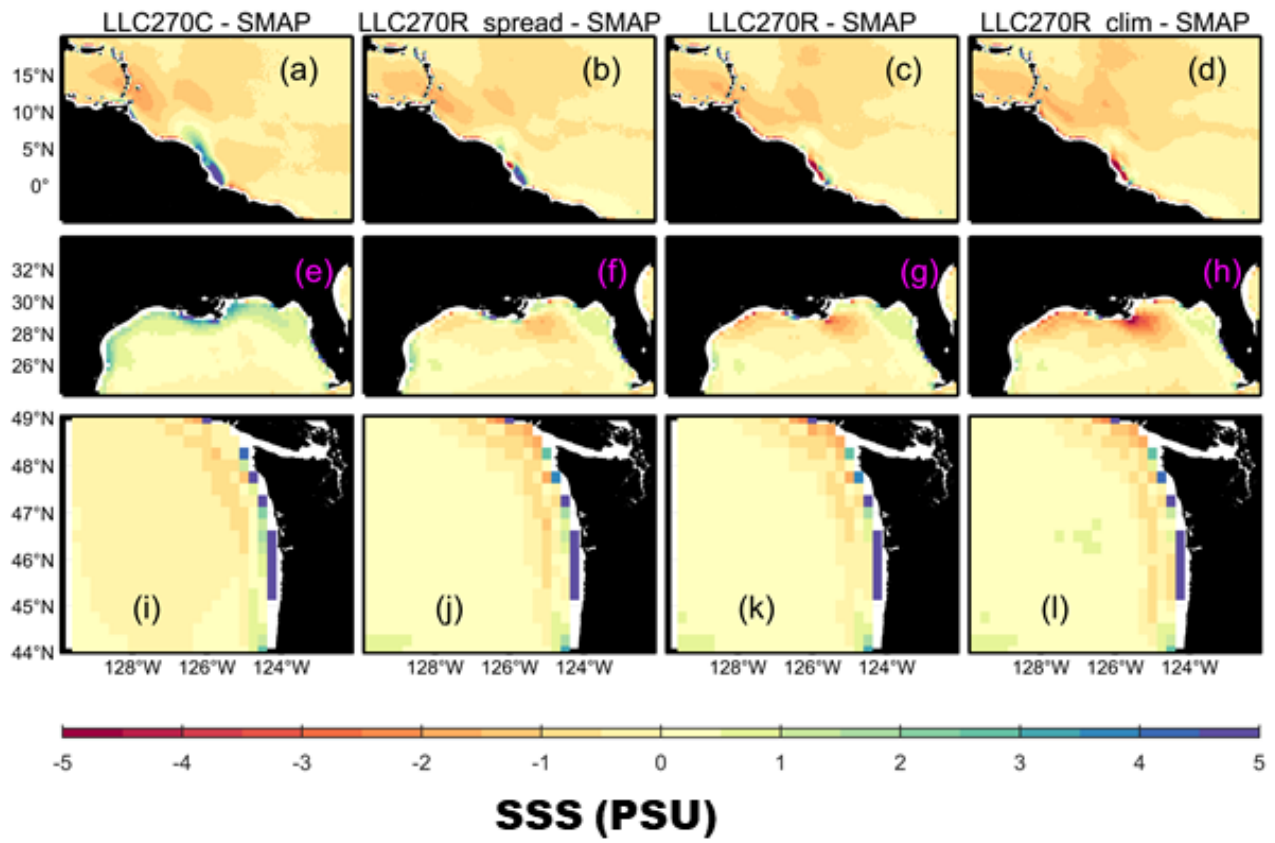

**Figure S8:** Zoomed-in view of SSS difference between different LLC270 experiments and SMAP observations for large (Amazon, a–d), medium (Mississippi, e–h), and small (Columbia, i–l) rivers.
